# Supplementary material for: Guanine tetrads: an IRMPD spectroscopy, energy resolved SORI-CID, and computational study of M(9-ethylguanine)4+(M = Li, Na, K, Rb, Cs) in the gas phase
Source: Royal Society of Chemistry journal article supplement (doi:10.1039/c5cp00580a), 2015-01-01

Supplementary Information for

**Guanine Tetrads: An IRMPD Spectroscopy, Energy Resolved SORI-CID, and  
Computational Study of  $M(9\text{-ethylguanine})_4^+$  ( $M=\text{Li, Na, K, Rb, Cs}$ ) in the  
Gas Phase**

by

Mohammad Azargun and Travis D. Fridgen

Department of Chemistry, Memorial University, St. John's, NL, Canada, A1B 3X7

\*author to whom all correspondence should be addressed at [tfridgen@mun.ca](mailto:tfridgen@mun.ca)

**Figure S1.** Profiles of the computed structures of the  $M(9eG)_4^+$  complexes computed using B3LYP/6-31+G(d,p) with Def2SVPD on the metal centres. The calculations are also empirically corrected for dispersion.

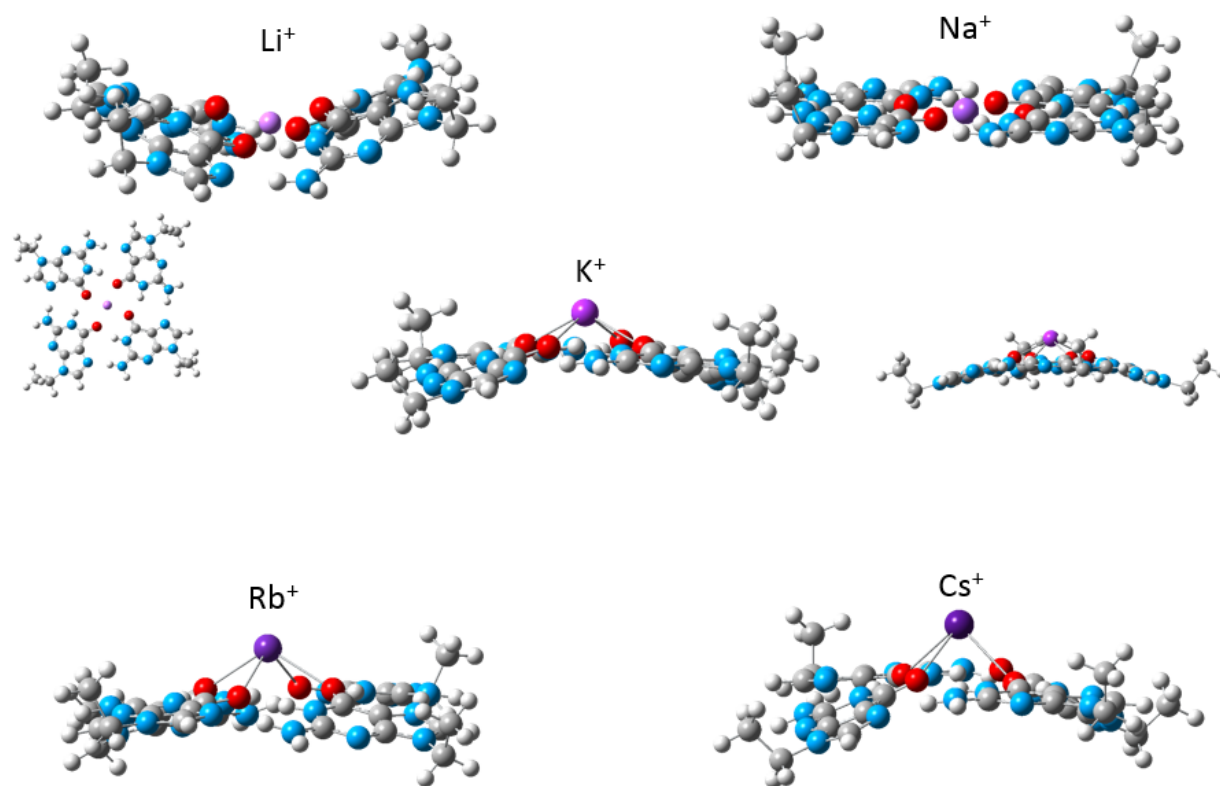

**Figure S2a)** Comparison of computed IR spectra for three isomers of  $\text{Na(9eG)}_4^+$  with the experimental IRMPD spectra.

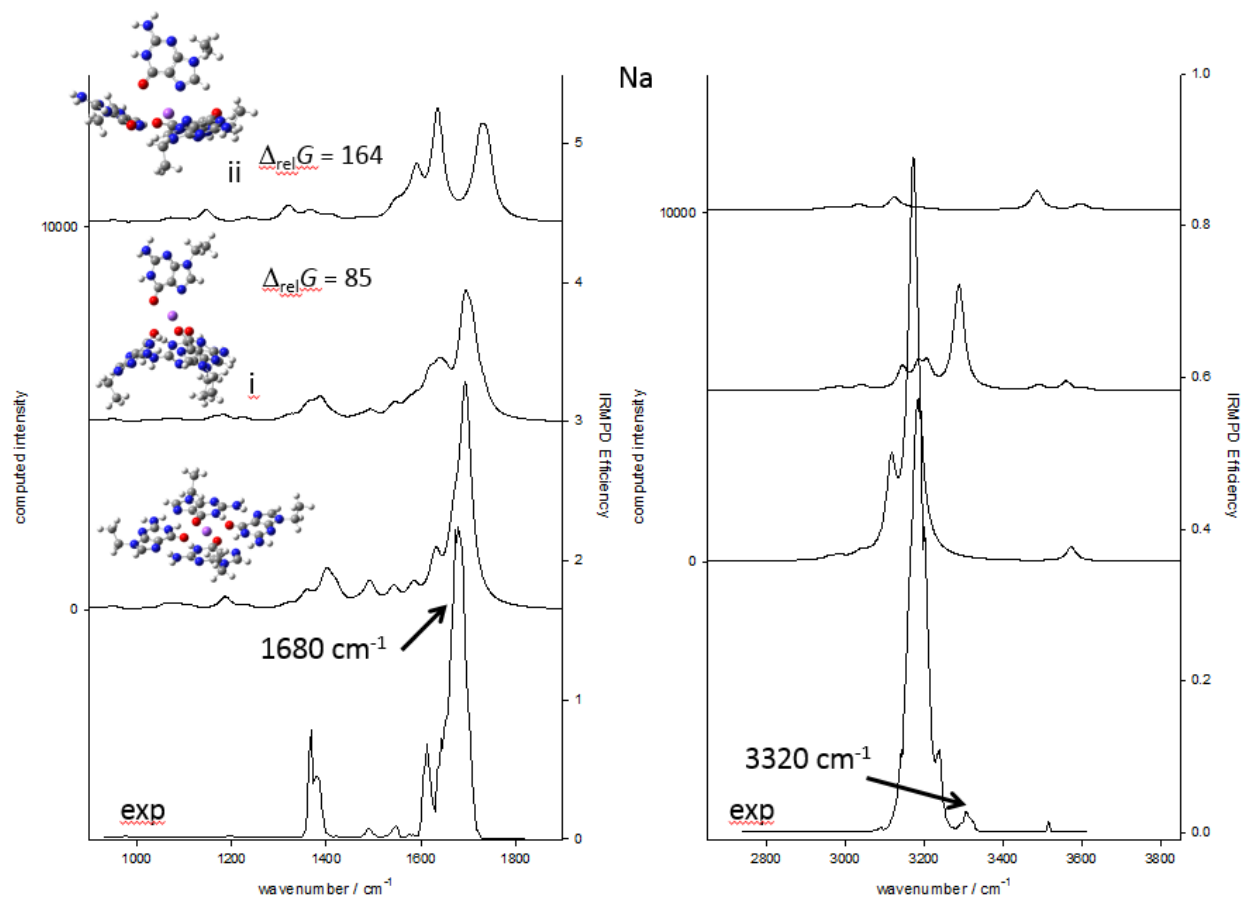

**Figure S2b)** Comparison of computed IR spectra for three isomers of  $\text{Li}(\text{9eG})_4^+$  with the experimental IRMPD spectra.

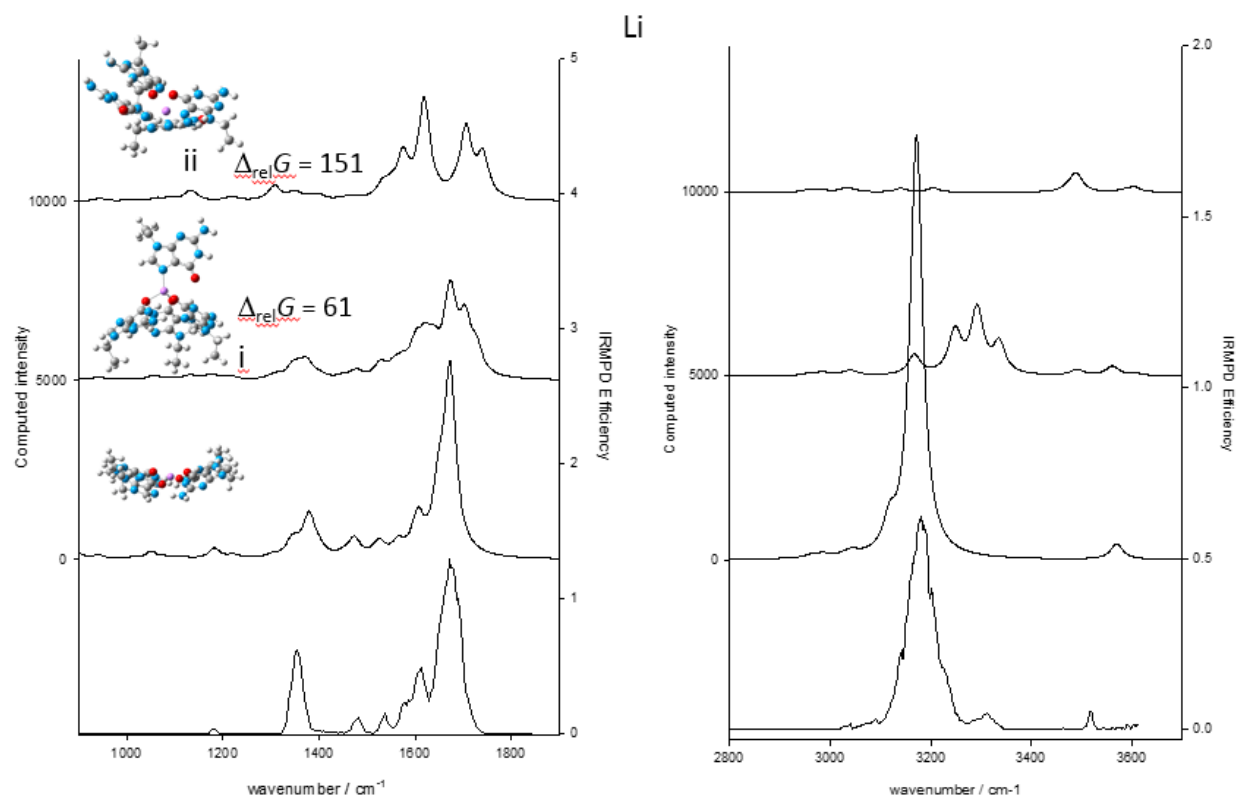

**Figure S2c)** Comparison of computed IR spectra for three isomers of  $K(9eG)_4^+$  with the experimental IRMPD spectra.

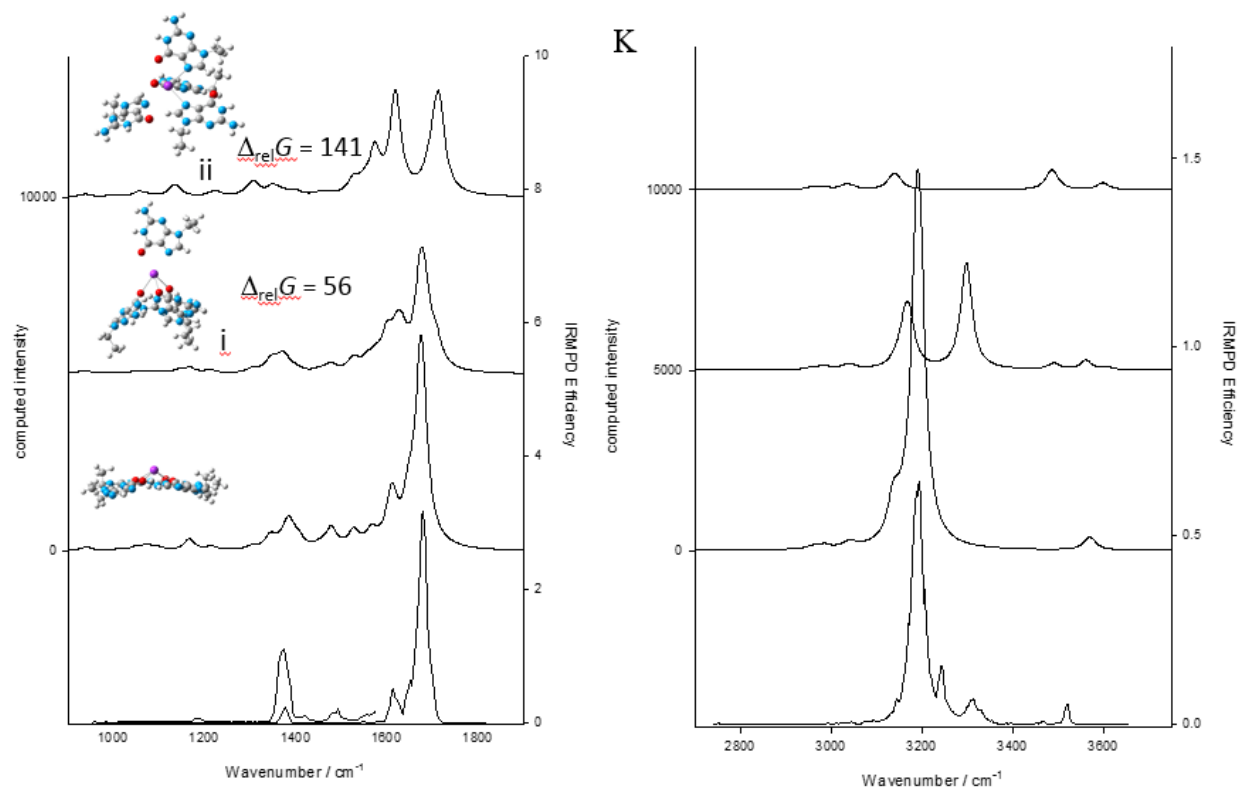

**Figure S3.** Energy resolved intensity profiles for SORI-CID of the  $M(9\text{-eG})_4^+$  complexes.

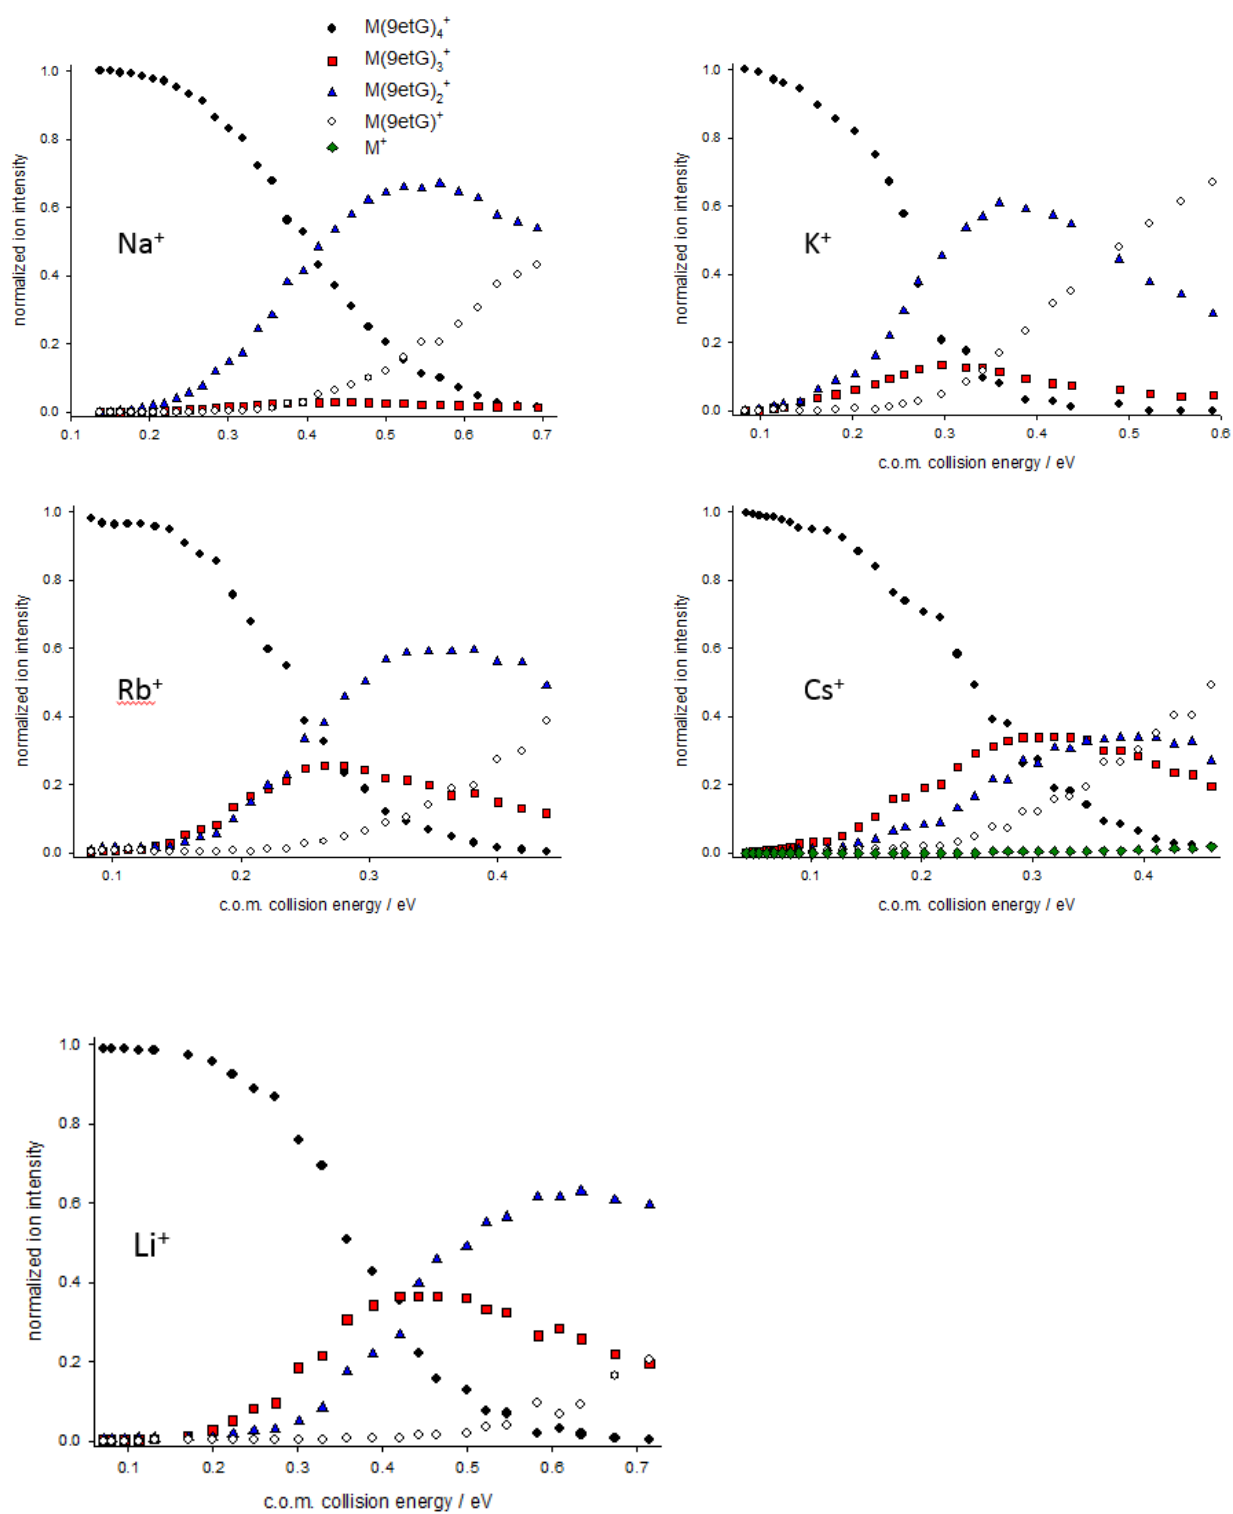

**Figure S4.** Energy-resolved G-tetrad intensity profiles for the SORI-CID of  $M(9eG)_4^+$  with a) a reservoir pressure of 5 mbar and b) a reservoir pressure of 15 mbar with Ar.

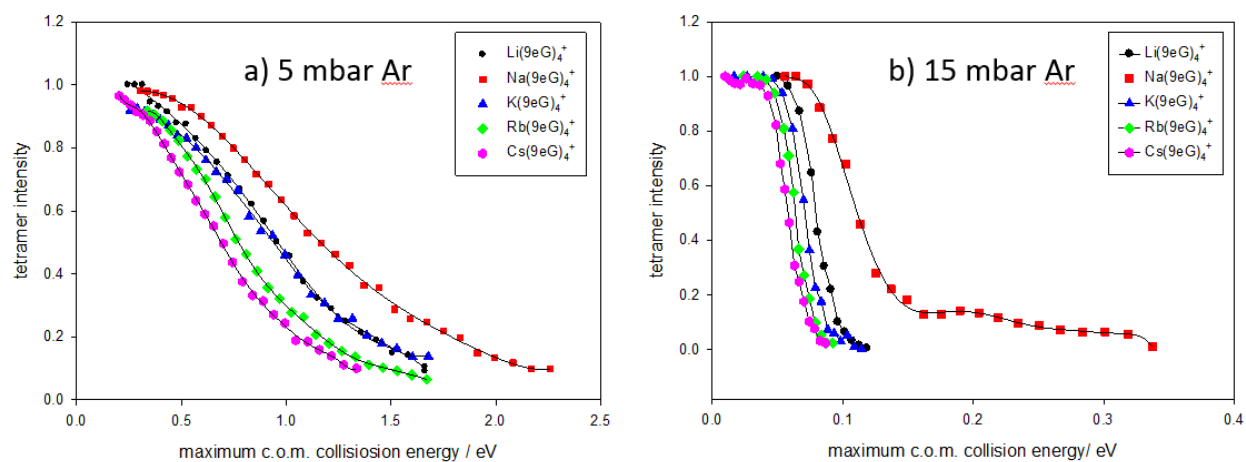

Supplement: c5cp00580a1.pdf [file c5cp00580a1.pdf]
